# Supplementary material for: Differential gene expression following TLR stimulation in rag1-/- mutant zebrafish tissues and morphological descriptions of lymphocyte-like cell populations
Source: PubMed Central journal article supplement (PMC5598945; doi:10.1371/journal.pone.0184077), 2017-09-14
Supplement: pone.0184077.s002.pdf [file pone.0184077.s002.pdf]

| Treatment                                   | Gene         | Tissue             | Time               | p value          | Mean $\pm$ SD (Treatment) | Mean $\pm$ SD (PBS)  |                      |                     |
|---------------------------------------------|--------------|--------------------|--------------------|------------------|---------------------------|----------------------|----------------------|---------------------|
| <b><math>\beta</math> glucan</b><br>(Fig 5) | <i>mx</i>    | Liver              | All time points    | 0.7871           |                           |                      |                      |                     |
|                                             |              | Kidney             | All time points    | 0.1386           |                           |                      |                      |                     |
|                                             |              | Spleen             | All time points    | 0.2652           |                           |                      |                      |                     |
|                                             | <i>tnfa</i>  | Liver<br>(Fig 5A)  | 1 hpi              | 0.0122           | 9.97 $\pm$ 3.09           | 1.14 $\pm$ 0.78      |                      |                     |
| 6 hpi                                       |              |                    | 0.0802             | 4.77 $\pm$ 1.33  | 0.91 $\pm$ 0.08           |                      |                      |                     |
| 12 hpi                                      |              |                    | 0.0415             | 13.55 $\pm$ 4.41 | 3.55 $\pm$ 1.03           |                      |                      |                     |
|                                             |              |                    |                    | 24 hpi           | 0.9427                    | 4.71 $\pm$ 3.03      | 6.21 $\pm$ 1.77      |                     |
|                                             |              |                    | Kidney<br>(Fig 5B) | 1 hpi            | 0.0006                    | 4.35 $\pm$ 1.15      | 0.25 $\pm$ 0.14      |                     |
|                                             |              |                    |                    | 6 hpi            | 0.0002                    | 8.34 $\pm$ 0.53      | 0.21 $\pm$ 0.04      |                     |
|                                             |              |                    |                    | 12 hpi           | 0.0463                    | 1.99 $\pm$ 1.38      | 0.29 $\pm$ 0.07      |                     |
|                                             |              |                    |                    | 24 hpi           | 0.7631                    | 3.74 $\pm$ 1.36      | 0.61 $\pm$ 0.92      |                     |
|                                             |              |                    | Spleen             | All time points  | 0.2386                    |                      |                      |                     |
|                                             |              | <i>ifny</i>        | Liver<br>(Fig 5C)  | 1 hpi            | <0.0001                   | 1502.27 $\pm$ 300.76 | 167.53 $\pm$ 122.24  |                     |
|                                             |              |                    |                    |                  | 6 hpi                     | <0.0001              | 1226.20 $\pm$ 518.96 | 115.95 $\pm$ 11.93  |
|                                             |              |                    |                    |                  | 12 hpi                    | <0.0001              | 1741.50 $\pm$ 904.84 | 207.35 $\pm$ 103.17 |
|                                             |              |                    |                    | 24 hpi           | <0.0001                   | 2232.38 $\pm$ 966.22 | 578.55 $\pm$ 225.71  |                     |
|                                             |              |                    | Kidney<br>(Fig 5D) | 1 hpi            | 0.0004                    | 68.61 $\pm$ 27.67    | 7.05 $\pm$ 3.89      |                     |
|                                             |              |                    |                    | 6 hpi            | <0.0001                   | 193.93 $\pm$ 81.42   | 9.63 $\pm$ 4.98      |                     |
|                                             |              |                    |                    | 12 hpi           | 0.0072                    | 62.57 $\pm$ 20.94    | 12.63 $\pm$ 4.59     |                     |
|                                             |              |                    |                    | 24 hpi           | 0.4280                    | 96.18 $\pm$ 28.98    | 59.48 $\pm$ 49.36    |                     |
|                                             |              |                    | Spleen<br>(Fig 5E) | 1 hpi            | <0.0001                   | 70.24 $\pm$ 30.89    | 13.40 $\pm$ 8.90     |                     |
|                                             |              |                    |                    | 6 hpi            | <0.0001                   | 110.87 $\pm$ 18.95   | 8.38 $\pm$ 3.71      |                     |
|                                             |              |                    |                    | 12 hpi           | <0.0001                   | 94.85 $\pm$ 30.77    | 31.10 $\pm$ 26.71    |                     |
|                                             |              |                    |                    | 24 hpi           | <0.0001                   | 116.27 $\pm$ 36.22   | 44.98 $\pm$ 12.16    |                     |
|                                             | <i>t-bet</i> | Liver              | All time points    | 0.4319           |                           |                      |                      |                     |
|                                             |              | Kidney<br>(Fig 5F) | 1 hpi              | 0.5820           | 0.24 $\pm$ 0.07           | 0.35 $\pm$ 0.17      |                      |                     |
|                                             |              |                    |                    | 6 hpi            | 0.0332                    | 0.59 $\pm$ 0.19      | 0.28 $\pm$ 0.09      |                     |
|                                             |              |                    |                    | 12 hpi           | 0.9899                    | 0.28 $\pm$ 0.07      | 0.31 $\pm$ 0.05      |                     |
|                                             |              |                    | 24 hpi             | 0.7258           | 0.35 $\pm$ 0.07           | 0.47 $\pm$ 0.16      |                      |                     |

|                            |              |                 |                 |         |             |           |
|----------------------------|--------------|-----------------|-----------------|---------|-------------|-----------|
|                            |              | Spleen          | All time points | 0.1656  |             |           |
|                            | <i>nitr9</i> | Liver           | All time points | 0.3400  |             |           |
|                            |              | Kidney (Fig 5G) | 1 hpi           | 0.9361  | 1.31±1.24   | 1.48±0.40 |
|                            |              |                 | 6 hpi           | 0.8726  | 1.30±0.05   | 1.10±0.36 |
|                            |              |                 | 12 hpi          | 0.0062  | 4.17±0.86   | 5.12±0.84 |
|                            |              |                 | 24 hpi          | <0.0001 | 1.89±1.46   | 7.1±1.03  |
|                            |              | Spleen          | All time points | 0.1060  |             |           |
| <b>Poly I:C</b><br>(Fig 6) | <i>mx</i>    | Liver (Fig 6A)  | 1 hpi           | 0.0145  | 3.80±0.98   | 2.12±1.06 |
|                            |              |                 | 6 hpi           | 0.0014  | 17.01±7.64  | 2.33±1.26 |
|                            |              |                 | 12 hp           | <0.0001 | 23.27±9.71  | 2.78±1.48 |
|                            |              |                 | 24 hpi          | 0.0002  | 14.50±7.93  | 3.11±1.50 |
|                            |              | Kidney (Fig 6B) | 1 hpi           | 0.9973  | 3.19±1.52   | 3.07±2.35 |
|                            |              |                 | 6 hpi           | 0.0182  | 19.59±15.54 | 1.86±1.53 |
|                            |              |                 | 12 hpi          | 0.0003  | 40.86±24.64 | 1.09±0.44 |
|                            |              |                 | 24 hpi          | 0.0052  | 13.04±5.56  | 1.08±0.48 |
|                            |              | Spleen (Fig 6C) | 1 hpi           | 0.9999  | 3.15±1.22   | 2.60±0.36 |
|                            |              |                 | 6 hpi           | 0.0028  | 8.03±5.67   | 0.13±0.18 |
|                            |              |                 | 12 hpi          | 0.0107  | 19.76±9.02  | 0.82±0.44 |
|                            |              |                 | 24 hpi          | 0.3500  | 5.95±3.46   | 1.42±1.07 |
|                            | <i>tnfa</i>  | Liver           | All time points | 0.1843  |             |           |
|                            |              | Kidney (Fig 6D) | 1 hpi           | 0.9997  | 0.97±0.26   | 1.12±0.36 |
|                            |              |                 | 6 hpi           | 0.9783  | 3.51±2.87   | 1.00±0.75 |
|                            |              |                 | 12 hpi          | 0.4310  | 1.77±0.42   | 0.61±0.37 |
|                            |              |                 | 24 hpi          | 0.0194  | 0.17±0.02   | 0.67±0.24 |
|                            |              | Spleen          | 1 hpi           | 0.9829  | 4.01±0.69   | 3.19±0.19 |
|                            |              |                 | 6 hpi           | 0.9894  | 1.59±1.00   | 1.09±0.48 |
|                            |              |                 | 12 hpi          | 0.4594  | 0.59±0.18   | 2.38±0.98 |
|                            |              |                 | 24 hpi          | 0.0041  | 0.17±0.03   | 2.13±0.55 |
|                            | <i>ifny</i>  | Liver           | All time points | 0.3992  |             |           |
|                            |              | Kidney (Fig 6F) | 1 hpi           | 0.9090  | 4.22±1.20   | 2.81±0.13 |
|                            |              |                 | 6 hpi           | 0.6046  | 8.38±4.31   | 4.59±2.68 |

|                        |              |                 |                 |         |             |             |
|------------------------|--------------|-----------------|-----------------|---------|-------------|-------------|
|                        |              |                 | 12 hpi          | 0.0025  | 6.31±2.14   | 0.99±0.95   |
|                        |              |                 | 24 hpi          | 0.9973  | 2.76±2.38   | 2.57±0.64   |
|                        |              | Spleen          | All time points | 0.0521  |             |             |
|                        | <i>t-bet</i> | Liver           | All time points | 0.1279  |             |             |
|                        |              | Kidney (Fig 6G) | 1 hpi           | 0.2044  | 0.58±0.20   | 0.35±0.17   |
|                        |              |                 | 6 hpi           | 0.0004  | 1.21±0.30   | 0.28±0.09   |
|                        |              |                 | 12 hpi          | 0.0913  | 0.64±0.26   | 0.31±0.05   |
|                        |              |                 | 24 hpi          | 0.9978  | 0.44±0.13   | 0.47±0.16   |
|                        |              | Spleen          | All time points | 0.1470  |             |             |
|                        | <i>nitr9</i> | Liver           | All time points | 0.5372  |             |             |
|                        |              | Kidney (Fig 6H) | 1 hpi           | 0.0274  | 18.77±7.86  | 1.13±0.52   |
|                        |              |                 | 6 hpi           | 0.7303  | 2.09±1.62   | 0.58±0.19   |
|                        |              |                 | 12 hpi          | 0.7253  | 1.23±1.13   | 2.69±1.49   |
|                        |              |                 | 24 hpi          | 0.2842  | 1.09±1.00   | 3.77±0.54   |
|                        |              | Spleen          | All time points | 0.1954  |             |             |
| <b>R848</b><br>(Fig 7) | <i>mx</i>    | Liver (Fig 7A)  | 1 hpi           | 0.0003  | 11.79±3.23  | 2.12±1.06   |
|                        |              |                 | 6 hpi           | 0.0002  | 30.46±12.59 | 2.33±1.26   |
|                        |              |                 | 12 hpi          | <0.0001 | 26.04±10.29 | 2.78±1.48   |
|                        |              |                 | 24 hpi          | <0.0001 | 58.25±20.03 | 3.11±1.50   |
|                        |              | Kidney (Fig 7B) | 1 hpi           | 0.0009  | 11.41±9.57  | 3.07±2.35   |
|                        |              |                 | 6 hpi           | 0.0008  | 32.60±10.69 | 1.86±1.53   |
|                        |              |                 | 12 hpi          | 0.0052  | 13.74±9.12  | 1.09±0.44   |
|                        |              |                 | 24 hpi          | 0.0014  | 19.03±9.75  | 1.08±0.48   |
|                        |              | Spleen (Fig 7C) | 1 hpi           | 0.6934  | 5.67±1.05   | 2.60±0.36   |
|                        |              |                 | 6 hpi           | <0.0001 | 4.37±1.20   | 0.06±0.03   |
|                        |              |                 | 12 hpi          | 0.0137  | 7.73±2.56   | 0.82±0.44   |
|                        |              |                 | 24 hpi          | 0.2371  | 4.70± 2.43  | 1.42 ±1.07  |
|                        | <i>tnfa</i>  | Liver           | All time points | 0.1815  |             |             |
|                        |              | Kidney          | All time points | 0.4432  |             |             |
|                        |              | Spleen          | All time points | 0.1167  |             |             |
|                        | <i>ifny</i>  | Liver (Fig 7D)  | 1 hpi           | 0.9897  | 16.27±5.22  | 29.08±24.58 |

|  |              |                    |                 |         |              |           |
|--|--------------|--------------------|-----------------|---------|--------------|-----------|
|  |              |                    | 6 hpi           | 0.0310  | 100.37±40.04 | 8.85±2.37 |
|  |              |                    | 12 hpi          | 0.0040  | 65.41±32.45  | 2.49±2.24 |
|  |              |                    | 24 hpi          | 0.0007  | 41.83±21.16  | 1.10±0.90 |
|  |              | Kidney<br>(Fig 7E) | 1 hpi           | <0.0001 | 12.61±4.14   | 2.81±0.13 |
|  |              |                    | 6 hpi           | <0.0001 | 153.23±90.34 | 4.59±2.68 |
|  |              |                    | 12 hpi          | 0.0030  | 31.45±25.55  | 0.99±0.95 |
|  |              |                    | 24 hpi          | <0.0001 | 24.34±15.29  | 2.57±0.64 |
|  |              | Spleen<br>(Fig 7F) | 1 hpi           | 0.7600  | 2.13±1.24    | 3.46±0.47 |
|  |              |                    | 6 hpi           | 0.0229  | 6.37±2.12    | 0.90±0.19 |
|  |              |                    | 12 hpi          | 0.0179  | 8.35±3.22    | 0.70±0.30 |
|  |              |                    | 24 hpi          | 0.0055  | 5.54±1.78    | 0.87±0.66 |
|  | <i>t-bet</i> | Liver<br>(Fig 7G)  | 1 hpi           | <0.0001 | 106.64±77.90 | 1.29±0.68 |
|  |              |                    | 6 hpi           | 0.0006  | 11.69±5.48   | 1.41±0.28 |
|  |              |                    | 12 hpi          | 0.9699  | 2.16±0.88    | 2.71±1.07 |
|  |              |                    | 24 hpi          | <0.0001 | 179.29±84.28 | 3.85±1.56 |
|  |              | Kidney<br>(Fig 7H) | 1 hpi           | 0.0006  | 3.80±2.80    | 0.35±0.17 |
|  |              |                    | 6 hpi           | 0.0006  | 7.15±1.99    | 0.28±0.09 |
|  |              |                    | 12 hpi          | 0.9913  | 0.68±0.80    | 0.31±0.05 |
|  |              |                    | 24 hpi          | 0.0789  | 2.47±1.17    | 0.47±0.16 |
|  |              | Spleen             | All time points | 0.0950  |              |           |
|  | <i>nitr9</i> | Liver<br>(Fig 7I)  | 1 hpi           | <0.0001 | 49.13±27.15  | 0.51±0.31 |
|  |              |                    | 6 hpi           | 0.0002  | 6.22±2.76    | 0.42±0.35 |
|  |              |                    | 12 hpi          | 0.6616  | 0.97±0.12    | 0.56±0.07 |
|  |              |                    | 24 hpi          | 0.9573  | 3.11±1.64    | 2.53±1.74 |
|  |              | Kidney<br>(Fig 7J) | 1 hpi           | 0.2292  | 0.90±0.56    | 0.77±0.73 |
|  |              |                    | 6 hpi           | 0.0010  | 10.18±2.59   | 0.58±0.19 |
|  |              |                    | 12 hpi          | 0.0811  | 0.51±0.15    | 2.69±1.49 |
|  |              |                    | 24 hpi          | 0.1154  | 0.91±0.30    | 3.77±0.54 |
|  |              | Spleen             | All time points | 0.4584  |              |           |
